# Supplementary material for: Effects of Resource Availability and Antibiotic Residues on Intestinal Antibiotic Resistance in Bellamya aeruginosa
Source: MDPI journal article supplement (doi:10.3390/microorganisms11030765), 2023-03-16
Supplement: s1 [file s1]

**Table S1.** Concentrations of florfenicol in water (µg/L).

| <b>Treatment</b> | <b>0 days (after water replacement)</b> | <b>84 days (before water replacement)</b> |
|------------------|-----------------------------------------|-------------------------------------------|
| HN               | 7.28 ± 5.05                             | 3213.05 ± 616.03                          |
| HA               | 7.28 ± 5.05                             | 4304.78 ± 345.13                          |
| LN               | 10.47 ± 6.14                            | 124.033 ± 31.46                           |
| LA               | 10.47 ± 6.14                            | 4550.68 ± 471.28                          |

**Table S2.** Formulation and proximate composition of commercial feed

| <b>Ingredient (g/100 g diet)</b> | <b>Basal diet</b> |
|----------------------------------|-------------------|
| Protein                          | 65                |
| Fat                              | 6                 |
| Ash                              | 6                 |
| Water                            | 6                 |
| Fibre                            | 4                 |
| Calcium                          | 0.9               |
| Phosphorus                       | 0.5               |
| Probiotics                       | 10000 CFU/g       |
| Vitamin A                        | 10000 IU/g        |
| Vitamin D3                       | 2000 IU/g         |
| Vitamin C                        | 600 IU/g          |
| Vitamin E                        | 100 IU/g          |
| Vitamin B1                       | 30 IU/g           |
| Vitamin B12                      | 5 IU/g            |

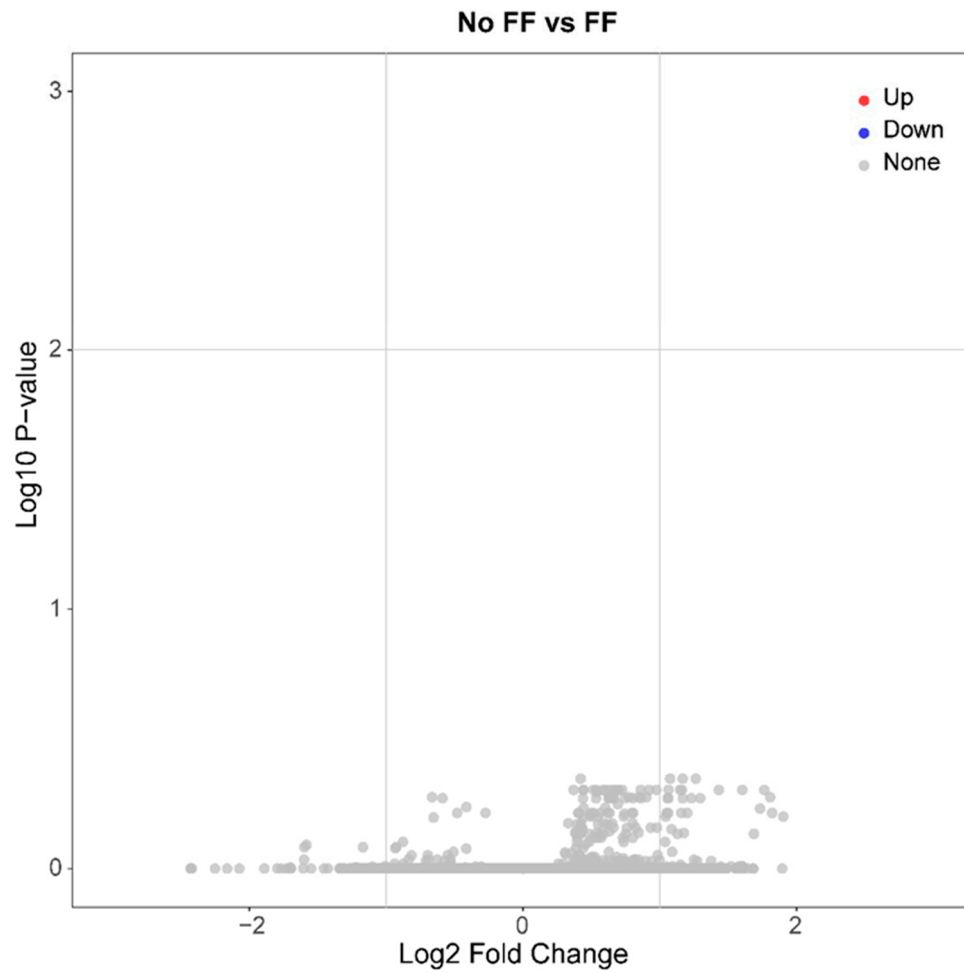

**Figure S1.** Impacts of florfenicol on functional pathways of *Bellamyia aeruginosa* intestinal bacteria.
